# Supplementary material
Source: ML conference proceedings conference paper supplement (https://openreview.net/forum?id=O4Tv5Cmpbv)

(a) Reaction Type (USPTO-190)

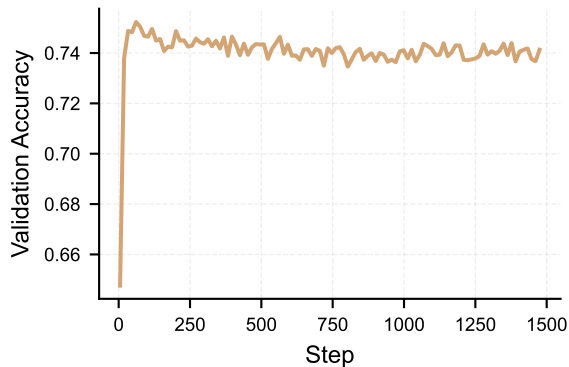

(b) Tanimoto Similarity (USPTO-190)

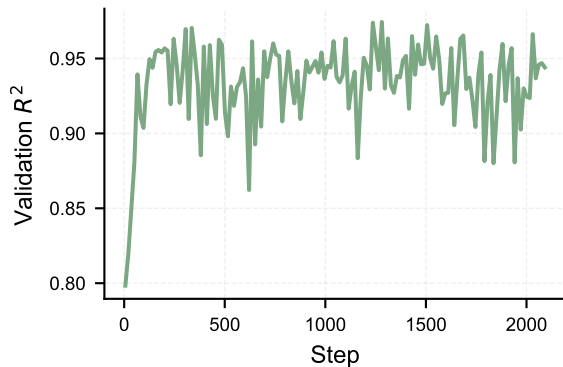

(c) Reaction Type (USPTO-50k)

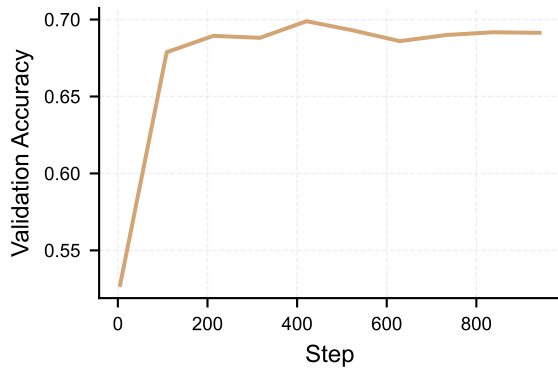

(d) Tanimoto Similarity (USPTO-50k)

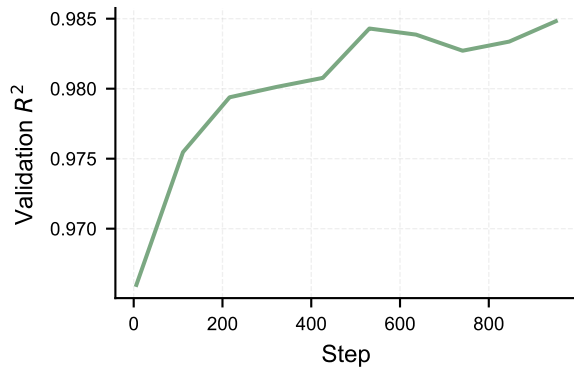

Supplement: supplementary_material [file classifier_training_curves.pdf › multiguide_submission/notebooks/classifier_training_curves.pdf]
